# Supplementary material for: Gas-phase pyrolysis products emitted by prescribed fires in pine forests with a shrub understory in the southeastern United States
Source: Copernicus journal article supplement (doi:10.5194/acp-19-9681-2019), 2019-08-01
Supplement: Supplementary file 1 [file acp-19-9681-2019-supplement.zip]

Archive with 2 entries (2 files):
- acp-19-9681-2019-supplement-title-page.pdf
- SI_v15.xlsx
