# Supplementary material for: Gas-phase pyrolysis products emitted by prescribed fires in pine forests with a shrub understory in the southeastern United States
Source: Copernicus journal article supplement (doi:10.5194/acp-19-9681-2019), 2019-08-01
Supplement: Supplementary file 1 [file acp-19-9681-2019-supplement.zip › acp-19-9681-2019-supplement-title-page.pdf]

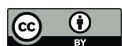

*Supplement of*

**Gas-phase pyrolysis products emitted by prescribed fires in pine forests with a shrub understory in the southeastern United States**

**Nicole K. Scharko et al.**

*Correspondence to:* Timothy J. Johnson ([timothy.johnson@pnnl.gov](mailto:timothy.johnson@pnnl.gov))

- [acp-19-9681-2019-supplement-title-page.pdf](#)
- [SI\\_v15.xlsx](#)

The copyright of individual parts of the supplement might differ from the CC BY 4.0 License.
