# Supplementary material for: Gas-phase pyrolysis products emitted by prescribed fires in pine forests with a shrub understory in the southeastern United States
Source: Copernicus journal article supplement (doi:10.5194/acp-19-9681-2019), 2019-08-01
Supplement: Supplementary file 1 [file acp-19-9681-2019-supplement.zip › SI_v15.xlsx]

## Sheet: Table_S1_IR_regions
Table S1. Spectral Domains Used for Gas Quantitation of Analytes of Interest
3000–2850a	2800–2650b	2250–2000c	1300–1239d	1260–1180e	1200–1100f	1100–850g	890–775h	800–730i	721–672j
CH4	H2Ok	CO	HONO	Acetone	H2Ok	Isobutene	Allene	Furan	Benzenem
HCHO	CH3CHO	H2Ok	H2Ok	H2Ok	Acrolein	CH3OH	Methyl nitrite	Naphthalene
Ethane		COS		Acetic Acid	HCOOH	C2H4	H2Ok	H2Ok
H2Ok		CO2l				Propene		HCN
						1,3-Butadiene		C2H2
						Isoprene		CO2l
						H2Ok		Furaldehyde
aC2H4, b-pinene, CH3OH, propene and 2-pentene included in the fit. bCH4, HCHO, C2H2 and acrolein included in the fit. cEthene and N2O included in the fit. dCH4, acetic acid and C2H2 included in the fit. eCH4 included in the fit. fCH4, furaldehyde, acetic acid, C2H4 and CH3CHO included in the fit. gCO2, furaldehyde, acrolein, methyl nitrite and allene included in the fit, and NH3 was checked for i…

## Sheet: Table_S2_elemental_analysis
Table S2. Elemental Analysis from from Safdar et al., 2018
	C	H	N	S	O
Longleaf pine foliage	51.37	3	1.21	0.11	44.31
Longleaf pine litter	52.31	6.09	2.31	0.06	39.23
Sparkleberry	52.49	7.71	0.74	0.16	38.9
Average	52.0567	5.6	1.42	0.11	40.8133
values are % dry mass and are from Safdari et al., 2018

## Sheet: Table_S3_Emission_Ratios
Table S3. MCE and ER (ppm/ppm CO) for each of the burns for the FTIR measurements. Standard Deviation (SD) represents the variation for the ten non-identical measurements.
		Site 16						Site 24A			Site 24B
		Plot 1			Plot 5	Plot 6
Species	Formula	Msmt 1	Msmt 2	Msmt 3	Msmt 1	Msmt 1	Msmt 2	Msmt 1	Msmt 2	Msmt 3	Msmt 24B	Study Average	SD
Carbon dioxide	CO2	6.73473	5.27586	5.69434	5.98728	3.60278	6.93304	3.4426	3.05939	6.65016	4.51811	5.18983	1.45363
Carbon monoxide	CO	1	1	1	1	1	1	1	1	1	1	1	0
Methane	CH4	0.0982537	0.0706179	0.0859342	0.112342	0.141482	0.099745	0.11144	0.0903191	0.0992654	0.103932	0.101333	0.0187386
Ethene	C2H4	0.0637298	0.0463835	0.0475809	0.0733039	0.0609217	0.0623482	0.0751977	0.0646477	0.0533633	0.0630471	0.0610524	0.00961329
Acetylene	C2H2	0.0412706	0.0295214	0.0376455	0.0529358	0.0604175	0.0404183	0.0422688	0.0456912	0.0311972	0.0271689	0.0408535	0.0104015
Propene	C3H6	0.00832862	0.00791909	0.00629491	0.0101445	0.00606714	0.0104826	0.0139183	0.00958529	0.0111411	0.00932248	0.00932041	0.00233905
Ethane	C2H6	0.0050308	0.00485186	0.00319392	0.00499156	0.00412189	0.0057665	0.00640366	0.00568254	0.00701912	0.00838759	0.00554494	0.00147808
1,3-Butadiene	C4H6	0.00250078	0.002405	0.00232139	0.00374031	0.00221316	0.00285289	0.00544664	0.00476102	0.00367406	0.00142182	0.00313371	0.00125193
Isoprene	C5H8	0.000445177	0.000399151	0.000421047	0.00108554	0.000276976	0.000387799	0.00434284	0.0031616	0.00130168	0	0.00118218	0.00143431
Isobutene	C4H8	0.000460461	0.000399363	0.000372513	0.000777426	0.000210792	0.000610887	0.00117486	0.000752106	0.000872659	0.000218736	0.00058498	0.000310126
Allene	C3H4	0.00107877	0.000829662	0.000906975	0.00140006	0.00114692	0.00118476	0.0012731	0.00139987	0.000836249	0.000814451	0.00108708	0.000230828
Acetaldehyde	CH3CHO	0.00788821	0.00712332	0.00523236	0.00841144	0.00463471	0.00935906	0.0135859	0.00967395	0.0113882	0.0161644	0.00934616	0.00358706
Acrolein	C3H4O	0.00336512	0.00297696	0.00215386	0.00336776	0.00147731	0.00410477	0.00677722	0.00365224	0.00438344	0.00869137	0.004095	0.00214818
Methanol	CH3OH	0.00558372	0.0017777	0.00365888	0.00381302	0.00254176	0.00383463	0.0129325	0.00360694	0.00407934	0.0192814	0.00611099	0.00556438
Acetone	(CH3)2CO	0.00218259	0.00215438	0.00178571	0.00222791	0.00122487	0.00261941	0.0036619	0.00194184	0.00404004	0.00738904	0.00292277	0.00178242
Acetic acid	CH3COOH	0.00263849	0.00178912	0.0012339	0.00149051	0.000371945	0.000942588	0.00217939	0.00159117	0.00149356	0.0208668	0.00345975	0.00614791
Formaldehyde	HCHO	0.00154962	0.00187967	0.00131236	0.00157452	0.000464514	0.000749699	0.00464709	0.00230729	0.00620085	0.01559	0.00362756	0.00456727
Furaldehyde	C4H3OCHO	0.00129341	0.000429521	0.00108154	0.000666749	0.000667829	0.000841934	0.00316329	0.00125837	0.000656782	0.00446842	0.00145278	0.00131271
Furan	C4H4O	0.000646955	0.000728863	0.000370383	0.000566783	0.000380068	0.000887443	0.00130108	0.000682284	0.00147474	0.0018331	0.00088717	0.000490232
Formic acid	HCOOH	0.00104025	0.000822653	0.000508341	0.000735832	0.000191041	0.000452524	0.000715522	0.000468049	0.000683586	0.00173572	0.000735352	0.000422117
Naphthalene	C10H8	0.00159371	0.000826766	0.0011123	0.000579066	0.00107475	0.00122483	0.000196812	0.000603193	0.000183848	0.000348169	0.000774344	0.000472909
Hydrogen cyanide	HCN	0.00783288	0.00728278	0.00839607	0.0092244	0.00851112	0.0076879	0.00525606	0.00647265	0.00584324	0.00686637	0.00733735	0.00124564
Nitrous acid	HONO	0.000158432	0.000383654	0.000296003	5.41444e-05	5.34374e-05	0.000105922	7.3385e-05	7.2661e-05	0.000263606	0.00156957	0.000303082	0.000459716
Methyl nitrite	CH3ONO	0.000910042	0.00099706	0.0021123	0.000306144	0.000443267	0.000373598	0.000233403	0.000454071	0.00269616	0.00207006	0.00105961	0.000900693
Water	H2O	0.865057	1.45804	1.10681	0.030625	0.146959		0.431204	0.815187	0.962466	6.88761	1.41155	2.10373
MCE		0.87092	0.840901	0.850751	0.857058	0.782905	0.874094	0.774907	0.753801	0.869371	0.818835	0.829354	0.0442597
Initial values for CO, CO2 and CH4 are 200 ppb, 409 ppm and 2.1 ppm. The initial values for water were obtained from the temperature/relative humidity displayed in Table 1.

## Sheet: Table_S4_Emission_Factors
Table S4. MCE and EF (g kg–1) for each of the burns for the FTIR measurements. Standard Deviation (SD) represents the variation for the ten non-identical measurements.
		Site 16						Site 24A			Site 24B
		Plot 1			Plot 5	Plot 6
Species	Formula	Msmt 1	Msmt 2	Msmt 3	Msmt 1	Msmt 1	Msmt 2	Msmt 1	Msmt 2	Msmt 3	Msmt 24B	Study Average	SD
Carbon dioxide	CO2	1571.12	1522.92	1540.3	1525.73	1354.19	1578.84	1311.72	1290.76	1570.64	1422.51	1468.87	113.471
Carbon monoxide	CO	148.474	183.716	172.157	162.185	239.223	144.936	242.502	268.518	150.316	200.383	191.241	44.5951
Methane	CH4	8.35392	7.42938	8.47192	10.4338	19.3819	8.2786	15.4756	13.8882	8.54464	11.9262	11.2184	3.92863
Ethene	C2H4	9.47573	8.53356	8.20308	11.9057	14.5947	9.04937	18.2617	17.3839	8.0328	12.6516	11.8092	3.83327
Acetylene	C2H2	5.69665	5.0421	6.02512	7.98156	13.4367	5.44604	9.52935	11.406	4.35961	5.0613	7.39845	3.09562
Propene	C3H6	1.85774	2.18567	1.62808	2.47174	2.18047	2.28249	5.07067	3.86671	2.51591	2.80644	2.68659	1.03516
Ethane	C2H6	0.801876	0.95692	0.590295	0.869094	1.05857	0.897238	1.66711	1.63808	1.13268	1.80434	1.14162	0.415838
1,3-Butadiene	C4H6	0.717017	0.853228	0.771751	1.17144	1.0224	0.798479	2.55063	2.46875	1.06649	0.550188	1.19704	0.715265
Isoprene	C5H8	0.160748	0.178339	0.176286	0.428171	0.161141	0.136692	2.56124	2.06463	0.47585	0	0.63431	0.903223
Isobutene	C4H8	0.136943	0.146964	0.128458	0.25256	0.101007	0.17735	0.570685	0.404528	0.262752	0.0877967	0.226905	0.154024
Allene	C3H4	0.229131	0.218049	0.223371	0.324835	0.392503	0.245647	0.441655	0.537735	0.179824	0.233471	0.302622	0.117909
Acetaldehyde	CH3CHO	1.84188	2.05808	1.41662	2.14542	1.74365	2.13324	5.18129	4.08517	2.69211	5.09394	2.83914	1.41232
Acrolein	C3H4O	0.999977	1.09461	0.742134	1.09318	0.707315	1.1907	3.28933	1.96279	1.31874	3.4857	1.58845	1.0106
Methanol	CH3OH	0.948317	0.37358	0.720529	0.70739	0.695532	0.635738	3.58737	1.10788	0.701413	4.41957	1.38973	1.40452
Acetone	(CH3)2CO	0.671948	0.820697	0.637453	0.74924	0.607583	0.787212	1.84135	1.08118	1.25923	3.07017	1.15261	0.77228
Acetic acid	CH3COOH	0.839857	0.704671	0.455412	0.518256	0.190758	0.292885	1.13305	0.915991	0.481312	8.96433	1.44965	2.65621
Formaldehyde	HCHO	0.24667	0.370229	0.242225	0.273779	0.119136	0.116494	1.2082	0.66423	0.999306	3.34927	0.758954	0.984116
Furaldehyde	C4H3OCHO	0.658795	0.270705	0.638751	0.370969	0.548067	0.418618	2.6316	1.15917	0.338682	3.07172	1.01071	1.00733
Furan	C4H4O	0.23347	0.325461	0.154982	0.223426	0.220989	0.312624	0.766877	0.445292	0.538801	0.892798	0.411472	0.249806
Formic acid	HCOOH	0.253813	0.248365	0.143816	0.196118	0.0751029	0.107782	0.285146	0.206535	0.16886	0.57157	0.225711	0.138334
Naphthalene	C10H8	1.08276	0.695028	0.876233	0.429745	1.17647	0.812312	0.218393	0.741145	0.126455	0.319246	0.64778	0.360642
Hydrogen cyanide	HCN	1.12229	1.29115	1.39487	1.44371	1.96482	1.07527	1.23001	1.67722	0.847602	1.32777	1.33747	0.314888
Nitrous acid	HONO	0.0394793	0.118294	0.0855258	0.0147381	0.0214548	0.0257655	0.0298676	0.0327455	0.0665024	0.527862	0.0962236	0.15515
Methyl nitrite	CH3ONO	0.294451	0.399181	0.792469	0.108203	0.231084	0.118	0.123345	0.265704	0.883184	0.903953	0.411957	0.322999
Water	H2O	82.6298	172.328	122.586	3.19542	22.6172		67.2729	140.823	93.0748	887.916	176.938	271.966
MCE		0.87092	0.840901	0.850751	0.857058	0.782905	0.874094	0.774907	0.753801	0.869371	0.818835	0.829354	0.0442597
Initial values for CO, CO2 and CH4 are 14 ppb, 409 ppm and 2.1 ppm. The initial values for water were obtained from the temperature/releative humidity displayed in Table 1.

## Sheet: Table_S5_Literature_ER
Table S5. Emission Ratio to CO (ppm/ppm) from prior studies used for comparison. Only emission ratios used for comparison are listed. Note that some emission ratios from prior studies are not listed.
Study	Methyl nitrite	SD	HCN	SD	CH4	SD	C2H4	SD	C2H2	SD	Naphthalene	SD	Formic acid	SD	Furan	SD	Furaldehyde	SD	Acetone	SD	Formaldehyde	SD	Acetic Acid	SD	Acrolein	SD	Methanol	SD	Acetaldehyde	SD
Gilman et al., 2015 (laboratory-burn chamber)
Southwestern mean	0.0008994	0.00111	0.0012331	0.0012922							7e-06	4.8e-06	0.0006359	0.0005705	0.000268	0.0002474	0.0003567	0.0002119	0.0006501	0.0007408	0.0053939	0.0031497	0.0053926	0.0032343	0.0008189	0.0006824	0.0036175	0.0029726	0.0015503	0.0011511
Southeastern mean	0.0005241	0.0005064	0.0027807	0.0016904	0.062302	0.032218	0.0081879	0.0042382	0.0017412	0.001358	4e-06	5e-06	0.0016007	0.0011054	0.0007302	0.0004732	0.0015298	0.0010837	0.0016035	0.0011498	0.012235	0.0072935	0.013029	0.0088369	0.0013107	0.0008806	0.0077807	0.0055412	0.0028332	0.0018131
Northern mean	0.0007641	0.0008964	0.0030223	0.0022719	0.096707	0.028737	0.018316	0.012843	0.005091	0.0056894	2.15e-05	1.22e-05	0.0017538	0.0019738	0.001109	0.0004337	0.0012999	0.0006555	0.0026208	1.0656/1000	0.017918	0.010541	0.0096068	0.006235	0.0035441	0.0016919	0.013698	0.0087348	0.0054742	0.003554
Koss et al., 2018 (laboratory)
study average for all fuels			0.0039	0.0036							0.0002	0.00016	0.0022	0.0014	0.0019	0.0011	0.0021	0.0014	0.0023	0.0017	0.02	0.01			0.0054	0.003	0.012	0.0059	0.0074	0.0052
Stockwell et al., 2014 (lab Fame-4)
Ponderosa Pine MT			0.00624	0.00156									0.00509117	0.00167339	0.00124689	0.000200145					0.0292237	0.00700637	0.0220754	0.00914615			0.0243967	0.00824284
Peat Indonesia			0.01548	0.00545									0.00160642	0.000819756	0.00168206	0.000776475					0.00497878	0.00235735	0.0184888	0.0152449			0.0137311	0.00970528
Sawgrass SC			0.00615	0.000882395									0.000674489	0.000398675	0.000784776	0.000278136					0.0078116	0.00248924	0.00520958	0.00295721			0.00344689	0.00178671
Hatch et al., 2017 (lab )
Ponderosa Pine MT			0.00619257
Black Spruce			0.00376049
Chinese Rice Straw			0.00404213
Indonesian Peat			0.00144123
Guérette et al., 2018 (Field ground-base)
Australian temperature forest			0.0063	0.0007
Stockwell et al., 2016 (Field ground-base)*
Peat Indonesia			0.0204758	0.00690106
Akagi et al., 2013(Field ground-base)**
Pine Forest, SC block 6 (ground-base)			0.00703174		0.0648611		0.00634808		0.00192081						0.00129325		2.49881e-05		0.00140891		0.0119253		0.0034317		0.000513919		0.0146744		0.00241176
Pine Forest, SC block 9b(ground-base)			0.0055748		0.127101		0.00966974		0.00149774						0.00416697		5.16632e-05		0.00321104		0.0142857		0.0113364		0.00093604		0.0355221		0.00397216
Pine Forest, SC block 22 (ground-base)			0.00522796		0.0813348		0.0056226		0.00067834						0.00159405		0.000211423		0.00691248		0.0105454		0.00508467		0.00219888		0.0141765		0.00893653
Pine Forest, SC ground-base Average			0.00594483	0.000957131	0.091099	0.0322484	0.00721347	0.00215789	0.00136563	0.000631683					0.00235142	0.00157949	9.60249e-05	0.000100824	0.00384414	0.00280588	0.0122521	0.00189144	0.00661758	0.00416933	0.00121628	0.000876741	0.0214577	0.0121827	0.00510682	0.00340716
Akagi et al., 2013(Field air-base)***
Pine Forest, SC block 6 (Air-base)			0.00983115		0.038955		0.0154907		0.00482665				0.000624119		0.0010551		0.000250415		0.00336968		0.022361		0.00741527		0.00118505		0.0132254		0.0049076
Pine Forest, SC block 9b(Air-base)			0.00923619		0.0394806		0.0133505		0.00280605				0.000595288		0.00089454		0.000101401		0.00180325		0.0213913		0.00380254		0.00155867		0.0137785		0.00349728
Pine Forest, SC block 22 (Air-base)			0.0117629		0.0474322		0.0126846		0.00290717				0.000904551		0.000611672		0.000531841		0.00482266		0.021427		0.00787913		0.00276829		0.013704		0.00690003
Pine Forest, SC pine plantation (Air-base)			0.00171125		0.106698		0.012276		0.00276314				0.000167482		0.00203857		9.36099e-05		0.00430942		0.0169427		0.00791672		0.00187481		0.0167626		0.00379771
Pine Forest, SC Georgetown (Air-base)			0.0135289		0.053843		0.0224679		0.0109059												0.0275925		0.0150947				0.00643523
Pine Forest, SC block 22 (Air-base)			0.00903403		0.0420893		0.0162588		0.00592988				0.000624119								0.0235567		0.00956809				0.0121046
Pine Forest, SC block 6 (Air-base)			0.00888219		0.0719887		0.0122274		0.00987844												0.0258873		0.0268444				0.0160571
Pine Forest, SC Air-base Average			0.00914095	0.00369443	0.0572124	0.0246665	0.0149651	0.00366914	0.00571675	0.00341991			0.000583112	0.000264378	0.00114997	0.000620111	0.000244317	0.000204813	0.00357625	0.00132631	0.0227369	0.00344998	0.0112173	0.00767496	0.00184671	0.000675985	0.0131525	0.00337615	0.00477565	0.00154067
Simpson et al., 2011 (Field air base)
Boreal forest in Canadia			0.0082	0.002
Liu et al., 2018 (Field air base)****
Fire 1			0.00377016
Fire 3			0.0103233
Fire 4			0.0243117
Fire 5			0.00586079
Fire 6			0.00639564
Fire 7			0.0134161
Fire 8			0.00347286
Fire 9			0.0126534
Fire 10			0.00659436
Fire 11			0.00871812
Fire 12			0.00822595
Fire 13			0.00771032
Fire 14			0.00655393
Fire 15			0.0151089
Fire 15			0.00950825	0.00548705
Southeastern agricultural Average
* derived from published emission factors, the CO emission factor is 291 (49) g kg–1, and HNC is 5.75 (1.60)g kg–1. Molar mass of CO 28.01 g mol–1 is and HCN is 27.03 g mol–1.
**derived from published emission factors, the ground base CO emission factors are 140, 158, 222, 0.85, 1.12 g kg–1, and HCN are 0.95, 0.85, 1.12g kg–1. Molar mass of CO 28.01 g mol–1 is and HCN is 27.03 g mol–1.
***derived from published emission factors, the air base CO emission factors are 78, 92, 74, 109, 72, 78, 49 g kg–1, and HCN are 0.74, 0.82, 0.84, 0.18, 0.94, 0.68, 0.42g kg–1. Molar mass of CO 28.01 g mol–1 is and HCN is 27.03 g mol–1.
****derived from published emission factors, the air base CO emission factors are 96.2, 79.2, 86.1, 73.2, 51.2, 63.8, 55.5, 67.4, 48.4, 39.7, 38.8, 71.5, 53.6 and 67.9 g kg–1, and HCN are 0.35, 0.789, 2.02, 0.414, 0.316, 0.826, 0.186, 0.823, 0.308, 0.334, 0.308, 0.532, 0.339, 0.99g kg–1. Molar mass of CO 28.01 g mol–1 is and HCN is 27.03 g mol–1.

## Sheet: Table_S6_OH_Reactivity
Table S6. OH rate constant used for reactivity calculation.
Species	Formula	OH rate constant (10–12cm3 molecules–1 s–1)	Reference
Carbon monoxide	CO	0.15	Gilman et al., (2015)
Furan	C4H4O	40	Gilman et al., (2015)
Acetic acid	CH3COOH	7.4	Sander et al., (2006)
Furaldehyde	C4H3OCHO	35.4	Gilman et al., (2015)
Acetylene	C2H2	0.775	NIST database*
Hydrogen cyanide	HCN	0.031	Sander et al., (2006)
Allene	C3H4	9.82	Atkinson et al., (2003)
Nitrous acid	HONO	4.5	Sander et al., (2006)
Naphthalene	C10H8	23	Atkinson et al., (2003)
Phenol	C6H6O	28	Sander et al., (2006)
Ammonia	NH3	0.16	Sander et al., (2006)
Ethene	C2H4	8.5	Atkinson et al., (2003)
Formic acid	HCOOH	0.4	Sander et al., (2006)
Methanol	CH3OH	0.91	Sander et al., (2006)
Acrolein	C3H4O	20	Gilman et al., (2015)
Isoprene	C5H8	100	Atkinson et al., (2003)
1,3-Butadiene	C4H6	58	Atkinson et al., (2003)
Propene	C3H6	30	NIST database*
isobutene	C4H8	51	Atkinson et al., (2003)
Methyl nitrite	CH3ONO	0.3	Sander et al., (2006)
acetone	C3H6O	0.2	Atkinson et al., (2003)
Carbonyl sulfide	OCS	0.0019	Sander et al., (2006)
Methane	CH4	0.0063	Sander et al., (2006)
Formaldehyde	HCHO	8.5	Sander et al., (2006)
Ethane	C2H6	0.24	Sander et al., (2006)
Acetaldehyde	CH3CHO	16	Sander et al., (2006)
*NIST Chemical Kinetics Database, http://kinetics.nist.gov/kinetics/index.jsp, accessed October 23, 2018

## Sheet: Figure_S1_Photo_device
Figure S1. Collection device used to probe pyrolysis gases.

## Sheet: Figure_S3
Figure S2. Emission ratios (relative to excess CO) for some of the oxygenated hydrocarbons measured by FTIR for plots located in (a) Site 16 and (b) Site 24A and 24B for individual canister measurements.

## Sheet: Figure_S4
Figure S3. shows the 50°C PNNL reference spectrum of benzene and (a) an experimental spectrum that is saturated at 673 cm–1 and (b) an experimental spectrum that is not saturated at that wavenumber.

## Sheet: Figure_S5
Figure S4. (a) Emission ratios (relative to excess CO) for methyl nitrite measured by FTIR (b) and mixing ratios (ppm) for methyl nitrite as a function of excess CO (ppm) measured by FTIR for each measurement, except for Site 16, plot 1- msmt 1; Plot 24A-msmt 3; and Plot 24B.

[truncated: 2 more sheets: Figure_S6, OH Reactivity]
